# Supplementary material for: sTWEAK is a marker of early haematoma growth and leukoaraiosis in intracerebral haemorrhage
Source: PubMed Central journal article supplement — Stroke Vasc Neurol. 2021 Mar 23;6(4):528–35. doi: 10.1136/svn-2020-000684 (PMC8717766; doi:10.1136/svn-2020-000684), 2021-03-23
Supplement: svn-2020-000684supp001.pdf [file svn-2020-000684supp001.pdf]

## Supplementary Information

**STWEAK is a marker of early hematoma growth and leukoaraiosis in intracerebral hemorrhage.****Table S1.** Clinical variables, biochemical parameters, neuroimaging values of included and excluded patients.

|                                              | Included patients<br>(653) | Excluded patients<br>(447) | p     |
|----------------------------------------------|----------------------------|----------------------------|-------|
| Age, years                                   | 71.1 ± 11.9                | 70.9 ± 14.5                | 0.912 |
| Women, %                                     | 44                         | 42.7                       | 0.71  |
| Previous Rankin scale                        | 1 [0, 1]                   | 1 [0, 1]                   | 0.091 |
| Latency time, min                            | 233.2 ± 208.7              | 228.8 ± 202.5              | 0.75  |
| Wake-up stroke, %                            | 5.4                        | 4                          | 0.305 |
| Arterial hypertension, %                     | 70.6                       | 68.7                       | 0.463 |
| Diabetes, %                                  | 21.9                       | 18.1                       | 0.128 |
| Smoking, %                                   | 9.6                        | 12.3                       | 0.166 |
| Enolism, %                                   | 15                         | 15.9                       | 0.734 |
| Hyperlipidemia, %                            | 40.6                       | 40.3                       | 0.95  |
| Peripheral arterial disease, %               | 5.1                        | 4                          | 0.468 |
| Atrial fibrillation, %                       | 22.2                       | 25.7                       | 0.193 |
| Ischemic heart disease, %                    | 10.1                       | 13.6                       | 0.084 |
| Heart failure, %                             | 3.4                        | 3.8                        | 0.741 |
| Previous antiaggregants, %                   | 15.8                       | 17.4                       | 0.508 |
| Previous anticoagulants, %                   | 19.3                       | 18.6                       | 0.815 |
| Axillary temperature at admission, °C        | 36.6 ± 0.8                 | 36.5 ± 0.7                 | 0.101 |
| Glucose, mg/dL                               | 139.9 ± 48.4               | 137.2 ± 47.6               | 0.405 |
| Glycosylated hemoglobin, %                   | 5.9 ± 1.0                  | 5.9 ± 0.8                  | 0.94  |
| Leukocytes, x10 <sup>3</sup> /mL             | 9.1 ± 3.2                  | 9.1 ± 3.4                  | 0.913 |
| Hemoglobin, g/dL                             | 13.7 ± 4.3                 | 13.5 ± 2.1                 | 0.265 |
| Platelets, x10 <sup>3</sup> /mL              | 215.1 ± 63.8               | 203.4 ± 77.9               | 0.314 |
| Fibrinogen, mg/dL                            | 443.3 ± 102.3              | 437.5 ± 100.1              | 0.432 |
| LDL-cholesterol, mg/dL                       | 108.8 ± 35.5               | 110.1 ± 35.4               | 0.64  |
| HDL-cholesterol, mg/dL                       | 38.6 ± 20.1                | 39.0 ± 15.4                | 0.771 |
| Triglycerides, mg/dL                         | 104.4 ± 50.7               | 105.8 ± 50.7               | 0.721 |
| Sedimentation rate, mm                       | 28.5 ± 22.0                | 28.8 ± 24.6                | 0.963 |
| Leukoaraiosis, %                             | 65.7                       | 60.2                       | 0.065 |
| Degree of leukoaraiosis                      |                            |                            | 0.219 |
| Grade I, %                                   | 28.8                       | 28.6                       |       |
| Grade II, %                                  | 27.4                       | 23.3                       |       |
| Grade III, %                                 | 9.5                        | 8.3                        |       |
| Basal volume ICH, mL                         | 40.3 ± 36.8                | 40.1 ± 64.1                | 0.942 |
| Location of the ICH                          |                            |                            | 0.069 |
| Lobar, %                                     | 40.9                       | 35                         |       |
| Deep, %                                      | 59.1                       | 65                         |       |
| Ventricular/subarachnoid contamination,<br>% | 18.8                       | 23.8                       | 0.129 |
| NIHSS at admission                           | 14 [9, 18]                 | 12 [8, 21]                 | 0.931 |

---

|                                      |          |          |       |
|--------------------------------------|----------|----------|-------|
| Rankin scale at 3 months             | 3 [2, 6] | 3 [1, 6] | 0.071 |
| Poor outcome at 3 months, %          | 64.3     | 58       | 0.095 |
| Etiopathogenesis                     |          |          | 0.114 |
| Hypertensive, %                      | 51.8     | 46.7     |       |
| Amyloid, %                           | 11.5     | 10.4     |       |
| Antiplatelet drugs/anticoagulants, % | 19.6     | 17       |       |
| Indeterminate/others, %              | 17.2     | 25.9     |       |

---
